# Supplementary material for: Shared effects of DISC1 disruption and elevated WNT signaling in human cerebral organoids
Source: PubMed Central journal article supplement (PMC5895714; doi:10.1038/s41398-018-0122-x), 2018-04-12
Supplement: 41398_2018_122_MOESM4_ESM.pdf [file 41398_2018_122_MOESM4_ESM.pdf]

| Gene Name | Description       | Wild-type organoids |     |     |     |     |     |     |     |     |     | DISC1 exon 8 wt/mut organoids |      |     |      |      |  |  |  |  |  |
|-----------|-------------------|---------------------|-----|-----|-----|-----|-----|-----|-----|-----|-----|-------------------------------|------|-----|------|------|--|--|--|--|--|
|           |                   | 210                 | 29  | 51  | 218 | 63  | 59  | 70  | 150 | 148 | 136 | 23                            | 84   | 685 | 51   | 41   |  |  |  |  |  |
| OLFM1     | A Domain          | 210                 | 29  | 51  | 218 | 63  | 59  | 70  | 150 | 148 | 136 | 23                            | 84   | 685 | 51   | 41   |  |  |  |  |  |
| ABCA7     | ABCA7             | 34                  | 162 | 148 | 21  | 123 | 66  | 147 | 95  | 70  | 82  | 123                           | 14   | 46  | 142  | 139  |  |  |  |  |  |
| ADAM10    | ADAM10            | 54                  | 83  | 115 | 108 | 171 | 69  | 102 | 93  | 79  | 92  | 140                           | 45   | 28  | 75   | 86   |  |  |  |  |  |
| ADAM19    | ADAM19            | 95                  | 134 | 61  | 17  | 106 | 111 | 176 | 73  | 50  | 103 | 95                            | 70   | 186 | 55   | 69   |  |  |  |  |  |
| ADAM9     | ADAM9             | 42                  | 96  | 116 | 127 | 157 | 77  | 86  | 102 | 70  | 85  | 127                           | 35   | 41  | 46   | 51   |  |  |  |  |  |
| APP       | APP               | 39                  | 99  | 166 | 58  | 97  | 110 | 130 | 267 | 633 | 413 | 647                           | 17   | 11  | 10   | 17   |  |  |  |  |  |
| APLP1     | APLP1             | 38                  | 152 | 139 | 59  | 68  | 115 | 130 | 115 | 105 | 63  | 73                            | 47   | 25  | 102  | 122  |  |  |  |  |  |
| APLP2     | APLP2             | 50                  | 103 | 124 | 88  | 146 | 82  | 107 | 110 | 73  | 145 | 177                           | 55   | 60  | 78   | 83   |  |  |  |  |  |
| APOE      | APOE              | 44                  | 98  | 87  | 72  | 159 | 103 | 136 | 121 | 117 | 168 | 221                           | 75   | 55  | 76   | 93   |  |  |  |  |  |
| LRP8      | APOE2             | 29                  | 136 | 110 | 109 | 114 | 86  | 115 | 103 | 104 | 222 | 262                           | 22   | 72  | 176  | 239  |  |  |  |  |  |
| APP       | APP-695           | 43                  | 124 | 146 | 70  | 104 | 97  | 117 | 88  | 84  | 123 | 149                           | 42   | 42  | 86   | 101  |  |  |  |  |  |
| APP       | APP-770           | 26                  | 130 | 148 | 65  | 104 | 99  | 128 | 74  | 48  | 151 | 185                           | 35   | 33  | 90   | 94   |  |  |  |  |  |
| APP       | APP-KPI           | 28                  | 110 | 132 | 73  | 112 | 108 | 138 | 87  | 58  | 147 | 165                           | 41   | 25  | 93   | 114  |  |  |  |  |  |
| ATF3      | ATF3              | 74                  | 70  | 66  | 169 | 168 | 59  | 94  | 200 | 222 | 74  | 157                           | 108  | 49  | 95   | 98   |  |  |  |  |  |
| AXIN2     | AXIN2             | 43                  | 168 | 132 | 80  | 99  | 77  | 100 | 79  | 68  | 76  | 98                            | 22   | 32  | 50   | 67   |  |  |  |  |  |
| OLFM1     | Pancorlin B/M Don | 77                  | 210 | 109 | 50  | 68  | 55  | 132 | 174 | 231 | 241 | 128                           | 361  | 585 | 257  | 395  |  |  |  |  |  |
| BACE1     | BACE1             | 89                  | 119 | 117 | 78  | 130 | 85  | 103 | 103 | 74  | 112 | 121                           | 53   | 48  | 66   | 72   |  |  |  |  |  |
| BACE2     | BACE2             | 22                  | 172 | 176 | 45  | 108 | 74  | 103 | 145 | 128 | 15  | 99                            | 48   | 3   | 52   | 64   |  |  |  |  |  |
| BIN1      | BIN1              | 32                  | 152 | 126 | 99  | 107 | 75  | 109 | 104 | 105 | 68  | 134                           | 45   | 1   | 57   | 85   |  |  |  |  |  |
| POU3F2    | BRN2              | 26                  | 99  | 70  | 128 | 127 | 123 | 126 | 37  | 20  | 18  | 42                            | 56   | 74  | 43   | 102  |  |  |  |  |  |
| CCND2     | CCND2             | 39                  | 116 | 148 | 93  | 110 | 85  | 110 | 83  | 60  | 99  | 120                           | 35   | 37  | 50   | 59   |  |  |  |  |  |
| BCL11B    | CTIP2             | 53                  | 113 | 153 | 110 | 82  | 111 | 78  | 172 | 120 | 73  | 78                            | 50   | 72  | 8    | 51   |  |  |  |  |  |
| CUX2      | CUX2              | 63                  | 111 | 119 | 39  | 64  | 142 | 163 | 111 | 47  | 22  | 103                           | 26   | 85  | 153  | 166  |  |  |  |  |  |
| CALB1     | Calbindin         | 70                  | 74  | 108 | 46  | 170 | 110 | 121 | 138 | 239 | 447 | 843                           | 2330 | 712 | 1329 | 1372 |  |  |  |  |  |
| CALB2     | Calretinin        | 87                  | 65  | 52  | 118 | 116 | 116 | 146 | 79  | 66  | 31  | 52                            | 11   | 119 | 22   | 7    |  |  |  |  |  |
| CUX1      | Cux1              | 66                  | 118 | 130 | 69  | 106 | 92  | 119 | 91  | 94  | 98  | 139                           | 57   | 30  | 73   | 84   |  |  |  |  |  |
| CCND1     | CyclinD1          | 63                  | 109 | 94  | 86  | 106 | 118 | 125 | 116 | 111 | 111 | 124                           | 125  | 54  | 111  | 157  |  |  |  |  |  |
| DAB1      | DAB1              | 31                  | 78  | 122 | 155 | 81  | 90  | 143 | 99  | 144 | 11  | 120                           | 13   | 4   | 107  | 107  |  |  |  |  |  |
| DAB2      | DAB2              | 77                  | 108 | 110 | 102 | 122 | 68  | 112 | 107 | 93  | 91  | 105                           | 59   | 8   | 32   | 43   |  |  |  |  |  |
| DCX       | DCX               | 58                  | 92  | 116 | 127 | 90  | 110 | 107 | 197 | 165 | 25  | 20                            | 52   | 78  | 115  | 123  |  |  |  |  |  |
| DISC1     | DISC1 L+Lv        | 75                  | 157 | 146 | 27  | 107 | 87  | 101 | 42  | 26  | 26  | 31                            | 31   | 101 | 41   | 14   |  |  |  |  |  |
| DISC1     | DISC1 Lv          | 101                 | 148 | 141 | 135 | 9   | 102 | 64  | 91  | 10  | 33  | 60                            | 12   | 137 | 96   | 39   |  |  |  |  |  |
| DIXDC1    | DIXDC1            | 74                  | 117 | 130 | 103 | 109 | 53  | 114 | 112 | 91  | 65  | 124                           | 88   | 31  | 74   | 109  |  |  |  |  |  |
| SLC1A3    | EAA1T1            | 12                  | 109 | 107 | 130 | 181 | 62  | 99  | 124 | 84  | 136 | 141                           | 38   | 29  | 70   | 52   |  |  |  |  |  |
| SLC1A2    | EAA2T1            | 55                  | 60  | 67  | 154 | 97  | 168 | 98  | 108 | 25  | 20  | 5                             | 23   | 75  | 69   | 43   |  |  |  |  |  |
| SLC1A1    | EAA3T3            | 79                  | 78  | 97  | 142 | 176 | 50  | 78  | 125 | 153 | 109 | 125                           | 57   | 3   | 99   | 60   |  |  |  |  |  |
| EPHA1     | EPHA1             | 50                  | 99  | 138 | 12  | 53  | 143 | 205 | 52  | 64  | 273 | 303                           | 71   | 44  | 105  | 132  |  |  |  |  |  |
| ERBB4     | ERBB4             | 92                  | 63  | 112 | 163 | 141 | 61  | 68  | 71  | 95  | 57  | 132                           | 13   | 14  | 24   | 10   |  |  |  |  |  |
| APBB1     | FE65              | 32                  | 165 | 131 | 73  | 107 | 79  | 114 | 123 | 120 | 103 | 91                            | 63   | 36  | 86   | 107  |  |  |  |  |  |
| FOXP2     | FOXP2             | 148                 | 106 | 82  | 131 | 91  | 94  | 48  | 222 | 200 | 15  | 44                            | 91   | 67  | 89   | 78   |  |  |  |  |  |
| FEZF2     | Fezf2             | 108                 | 38  | 44  | 39  | 75  | 227 | 169 | 135 | 267 | 681 | 721                           | 146  | 160 | 553  | 544  |  |  |  |  |  |
| FOXP1     | FoxG1             | 131                 | 16  | 82  | 177 | 64  | 194 | 58  | 17  | 13  | 46  | 103                           | 286  | 16  | 1533 | 1400 |  |  |  |  |  |
| GAD1      | GAD1              | 52                  | 120 | 76  | 19  | 152 | 102 | 179 | 52  | 113 | 182 | 248                           | 178  | 71  | 159  | 175  |  |  |  |  |  |
| GLRB      | GLRB              | 100                 | 123 | 126 | 110 | 106 | 75  | 61  | 419 | 497 | 66  | 68                            | 272  | 87  | 221  | 212  |  |  |  |  |  |
| GRIA2     | GRIA2             | 107                 | 113 | 134 | 41  | 122 | 75  | 109 | 247 | 205 | 15  | 69                            | 74   | 5   | 281  | 176  |  |  |  |  |  |
| GRIK1     | GRIK1             | 109                 | 125 | 99  | 29  | 214 | 77  | 47  | 52  | 16  | 36  | 56                            | 59   | 149 | 39   | 21   |  |  |  |  |  |
| GRIN2A    | GRIN2A            | 51                  | 149 | 203 | 41  | 107 | 58  | 91  | 44  | 31  | 176 | 87                            | 19   | 27  | 31   | 18   |  |  |  |  |  |
| GSK3B     | GSK3b             | 19                  | 131 | 134 | 104 | 127 | 80  | 105 | 136 | 140 | 99  | 133                           | 76   | 22  | 143  | 151  |  |  |  |  |  |
| HES1      | HES1              | 85                  | 124 | 114 | 91  | 105 | 81  | 100 | 124 | 141 | 60  | 93                            | 86   | 28  | 72   | 93   |  |  |  |  |  |
| HES5      | HES5              | 24                  | 334 | 101 | 40  | 76  | 79  | 47  | 64  | 104 | 99  | 101                           | 10   | 3   | 121  | 107  |  |  |  |  |  |
| B3GAT1    | HNK1              | 38                  | 176 | 118 | 18  | 113 | 123 | 115 | 299 | 336 | 24  | 94                            | 234  | 93  | 270  | 306  |  |  |  |  |  |
| HOXA1     | HOXA1             | 132                 | 225 | 168 | 48  | 23  | 20  | 84  | 154 | 153 | 46  | 199                           | 71   | 179 | 11   | 51   |  |  |  |  |  |
| HOXA2     | HOXA2             | 60                  | 180 | 115 | 67  | 68  | 100 | 126 | 183 | 26  | 23  | 117                           | 270  | 25  | 68   | 68   |  |  |  |  |  |
| HOXB13    | HOXB1             | 80                  | 108 | 73  | 50  | 124 | 156 | 109 | 177 | 36  | 196 | 129                           | 274  | 109 | 76   | 119  |  |  |  |  |  |
| HSPA1A    | HSPA1A            | 18                  | 101 | 91  | 43  | 124 | 125 | 199 | 86  | 74  | 180 | 136                           | 176  | 122 | 232  | 262  |  |  |  |  |  |
| HOXB4     | HoxB4             | 47                  | 96  | 110 | 94  | 187 | 63  | 104 | 97  | 65  | 116 | 135                           | 47   | 26  | 16   | 20   |  |  |  |  |  |
| IRX3      | Irx3              | 35                  | 179 | 190 | 59  | 87  | 71  | 79  | 65  | 56  | 135 | 114                           | 5    | 13  | 33   | 39   |  |  |  |  |  |
| ISL1      | Isl1              | 84                  | 76  | 83  | 174 | 104 | 97  | 83  | 275 | 286 | 30  | 41                            | 98   | 61  | 86   | 120  |  |  |  |  |  |
| PAFAH1B1  | LIS1              | 48                  | 77  | 100 | 161 | 125 | 83  | 106 | 146 | 111 | 105 | 97                            | 64   | 55  | 101  | 120  |  |  |  |  |  |
| LMX1A     | LMX1A             | 26                  | 112 | 112 | 121 | 140 | 96  | 93  | 62  | 97  | 101 | 130                           | 68   | 111 | 69   | 66   |  |  |  |  |  |
| OLFM1     | M domain          | 96                  | 122 | 100 | 126 | 91  | 87  | 79  | 337 | 360 | 14  | 44                            | 146  | 14  | 127  | 127  |  |  |  |  |  |
| MAP2      | MAP2              | 27                  | 65  | 87  | 162 | 149 | 106 | 103 | 134 | 165 | 32  | 45                            | 98   | 27  | 97   | 115  |  |  |  |  |  |
| NDL1      | NDL1              | 68                  | 96  | 108 | 113 | 125 | 93  | 98  | 97  | 106 | 118 | 164                           | 79   | 10  | 62   | 92   |  |  |  |  |  |
| NFKB1     | NFKB1             | 9                   | 144 | 141 | 85  | 105 | 71  | 116 | 156 | 144 | 42  | 129                           | 94   | 23  | 121  | 148  |  |  |  |  |  |
| SLC9A6    | NHE9              | 41                  | 140 | 108 | 85  | 142 | 76  | 109 | 75  | 99  | 39  | 123                           | 74   | 154 | 118  | 128  |  |  |  |  |  |
| SLC9A9    | NHE9              | 78                  | 126 | 137 | 141 | 78  | 83  | 58  | 155 | 171 | 16  | 56                            | 89   | 69  | 48   | 42   |  |  |  |  |  |
| SLC12A2   | NKCC1             | 34                  | 140 | 110 | 94  | 91  | 97  | 133 | 136 | 87  | 94  | 121                           | 74   | 46  | 99   | 118  |  |  |  |  |  |
| NPY       | NPY               | 97                  | 182 | 182 | 136 | 65  | 22  | 38  | 40  | 40  | 74  | 126                           | 8    | 11  | 14   | 15   |  |  |  |  |  |
| NRG1      | NRG1              | 16                  | 109 | 81  | 142 | 96  | 118 | 137 | 165 | 184 | 90  | 99                            | 181  | 160 | 224  | 268  |  |  |  |  |  |
| NES       | Nestin            | 20                  | 163 | 170 | 55  | 78  | 82  | 131 | 100 | 88  | 83  | 115                           | 61   | 20  | 116  | 152  |  |  |  |  |  |
| NEUROD1   | NeuroD1           | 109                 | 44  | 60  | 224 | 134 | 65  | 64  | 440 | 457 | 18  | 11                            | 138  | 82  | 80   | 102  |  |  |  |  |  |
| NEUROG1   | Neurogenin1       | 84                  | 108 | 53  | 49  | 120 | 137 | 149 | 515 | 386 | 8   | 28                            | 158  | 32  | 223  | 301  |  |  |  |  |  |
| POU5F1    | Oct4              | 2                   | 39  | 42  | 1   | 65  | 220 | 331 | 18  | 53  | 378 | 659                           | 362  | 98  | 237  | 286  |  |  |  |  |  |
| PDE4B     | PDE4B             | 249                 | 93  | 88  | 71  | 91  | 21  | 88  | 109 | 87  | 9   | 41                            | 52   | 40  | 28   | 49   |  |  |  |  |  |
| PICALM    | PICALM            | 75                  | 102 | 101 | 127 | 150 | 69  | 76  | 131 | 118 | 86  | 115                           | 77   | 94  | 85   | 94   |  |  |  |  |  |
| DLG4      | PSD-95            | 41                  | 145 | 124 | 79  | 109 | 94  | 107 | 115 | 107 | 104 | 144                           | 68   | 21  | 126  | 158  |  |  |  |  |  |
| PSEN1     | PSEN1             | 52                  | 128 | 134 | 76  | 106 | 93  | 111 | 103 | 100 | 88  | 120                           | 78   | 48  | 125  | 133  |  |  |  |  |  |
| PSEN2     | PSEN2             | 45                  | 138 | 133 | 77  | 154 | 46  | 108 | 200 | 247 | 78  | 111                           | 98   | 189 | 114  | 131  |  |  |  |  |  |
| RELN      | Reelin            | 25                  | 100 | 195 | 55  | 109 | 70  | 96  | 45  | 21  | 146 | 124                           | 12   | 24  | 14   | 11   |  |  |  |  |  |
| S100B     | S100b             | 241                 | 66  | 66  | 209 | 71  | 20  | 27  | 199 | 260 | 1   | 12                            | 242  | 0   | 14   | 14   |  |  |  |  |  |
| SORL1     | SORL1             | 8                   | 148 | 139 | 17  | 95  | 126 | 167 | 32  | 28  | 226 | 205                           | 64   | 34  | 134  | 162  |  |  |  |  |  |
| SYP       | SYP               | 48                  | 126 | 120 | 17  | 38  | 226 | 124 | 212 | 152 | 49  | 16                            | 20   | 65  | 287  | 308  |  |  |  |  |  |
| SATB1     | Satb1             | 60                  | 82  | 101 | 118 | 126 | 98  | 116 | 126 | 99  | 110 | 123                           | 68   | 40  | 93   | 126  |  |  |  |  |  |
| SIX3      | Six3              | 113                 | 73  | 95  | 30  | 55  | 168 | 166 | 93  | 177 | 37  | 161                           | 61   | 322 | 1232 | 1602 |  |  |  |  |  |
| SOX1      | Sox1              | 35                  | 96  | 69  | 13  | 105 | 166 | 217 | 59  | 65  | 122 | 294                           | 47   | 99  | 130  | 210  |  |  |  |  |  |
| SOX2      | Sox2              | 28                  | 101 | 67  | 58  | 100 | 158 | 190 | 106 | 129 | 172 | 250                           | 206  | 97  | 438  | 591  |  |  |  |  |  |
| SYN1      | Synapsin          | 496                 | 71  | 22  | 29  | 8   | 48  | 25  | 39  | 54  | 65  | 33                            | 83   | 390 | 12   | 4    |  |  |  |  |  |
| ADAM17    | TACE/ADAM17       | 43                  | 99  | 106 | 124 | 143 | 86  | 100 | 117 | 107 | 91  | 136                           | 91   | 55  | 117  | 145  |  |  |  |  |  |
| MAP7      | TAU 3R            | 67                  | 155 | 114 | 64  | 74  | 115 | 110 | 165 | 141 | 46  | 80                            | 51   | 16  | 68   | 101  |  |  |  |  |  |
| MAP7      | TAU ALL           | 35                  | 144 | 138 | 88  | 70  | 130 | 116 | 143 | 143 | 43  | 46                            | 47   | 76  | 69   | 123  |  |  |  |  |  |
| TSNAX     | TSNAX ex3/4       | 116                 | 80  | 74  | 178 | 167 | 41  | 44  | 133 | 159 | 69  | 84                            | 115  | 107 | 61   | 57   |  |  |  |  |  |
| TWIST1    | TWIST1            | 117                 | 111 | 83  | 173 | 94  |     |     |     |     |     |                               |      |     |      |      |  |  |  |  |  |

| Gene Name | Description | Wild-type DMSO |     |     |     |     |     |     |     |     |      | Wild-type CHR9821 |     |     |     |     |     |     |      |     |     | DISC1 exon 8 w/mt DMSO |     |      |      |     |      |      |      |     |     |     |      |     |     |     |     |     |     |
|-----------|-------------|----------------|-----|-----|-----|-----|-----|-----|-----|-----|------|-------------------|-----|-----|-----|-----|-----|-----|------|-----|-----|------------------------|-----|------|------|-----|------|------|------|-----|-----|-----|------|-----|-----|-----|-----|-----|-----|
| DLFM1     | A domain    | 0.6            | 0.8 | 0.8 | 0.9 | 0.6 | 1.2 | 1.3 | 0.6 | 0.8 | 1.7  | 1.9               | 1.3 | 0.9 | 1.0 | 0.7 | 0.7 | 0.6 | 0.7  | 0.5 | 0.8 | 1.0                    | 0.6 | 0.6  | 1.0  | 0.9 | 0.9  | 0.5  | 0.7  | 0.6 | 0.8 | 0.4 | 1.1  | 1.2 | 1.1 | 1.3 | 1.6 | 2.3 | 0.2 |
| ABCAC7    | ABCAC7      | 1.0            | 1.0 | 1.0 | 1.1 | 1.0 | 0.9 | 1.5 | 1.2 | 0.7 | 0.8  | 1.2               | 1.1 | 1.0 | 1.2 | 1.3 | 1.4 | 2.1 | 2.1  | 2.3 | 1.9 | 1.2                    | 1.7 | 1.2  | 1.0  | 1.2 | 1.5  | 1.6  | 1.1  | 1.4 | 1.4 | 1.0 | 1.1  | 1.3 | 1.4 | 1.0 | 1.1 | 2.0 |     |
| ADAM10    | ADAM10      | 0.8            | 0.8 | 1.1 | 1.0 | 0.8 | 0.8 | 1.1 | 1.1 | 1.0 | 1.1  | 1.0               | 1.1 | 1.0 | 1.1 | 1.0 | 1.1 | 1.1 | 1.1  | 1.1 | 1.1 | 1.1                    | 1.1 | 1.1  | 1.1  | 1.1 | 1.1  | 1.1  | 1.1  | 1.1 | 1.1 | 1.1 | 1.1  | 1.1 | 1.1 | 1.1 | 1.1 | 1.1 |     |
| ADAM9     | ADAM9       | 0.9            | 1.0 | 0.9 | 1.0 | 1.0 | 1.1 | 0.9 | 1.5 | 1.4 | 0.8  | 1.4               | 0.8 | 1.0 | 0.3 | 0.7 | 0.4 | 4.7 | 4.5  | 3.9 | 4.7 | 4.1                    | 4.1 | 4.3  | 5.7  | 3.7 | 3.4  | 5.2  | 3.7  | 1.9 | 2.2 | 1.9 | 2.1  | 2.1 | 2.4 | 1.3 | 0.0 |     |     |
| ADAM8     | ADAM8       | 0.9            | 0.8 | 0.7 | 0.8 | 0.7 | 1.2 | 1.1 | 1.1 | 0.8 | 0.9  | 1.1               | 1.4 | 1.4 | 1.5 | 1.4 | 2.6 | 2.6 | 2.8  | 2.0 | 3.8 | 3.5                    | 1.9 | 2.2  | 2.8  | 3.2 | 2.8  | 3.8  | 3.1  | 5.0 | 1.3 | 1.4 | 1.3  | 1.1 | 1.1 | 1.1 | 2.3 |     |     |
| APP       | APP         | 0.4            | 0.2 | 0.5 | 0.1 | 3.1 | 0.1 | 3.2 | 0.0 | 0.0 | 4.1  | 2.8               | 0.1 | 0.0 | 0.0 | 0.2 | 0.2 | 0.2 | 0.2  | 0.1 | 0.1 | 0.4                    | 0.6 | 0.2  | 1.0  | 0.3 | 0.6  | 0.9  | 0.0  | 0.0 | 0.0 | 0.0 | 0.0  | 0.0 | 0.0 | 0.0 | 0.0 |     |     |
| APLP1     | APLP1       | 1.0            | 1.1 | 1.0 | 1.2 | 0.8 | 0.8 | 1.1 | 1.1 | 1.0 | 1.1  | 1.0               | 1.3 | 1.4 | 0.8 | 0.8 | 0.9 | 0.9 | 1.0  | 0.9 | 0.7 | 0.7                    | 0.9 | 0.6  | 0.7  | 0.8 | 0.8  | 0.8  | 0.8  | 0.8 | 0.8 | 0.8 | 0.8  | 0.8 | 0.8 | 0.8 |     |     |     |
| APLP2     | APLP2       | 0.8            | 0.8 | 0.8 | 0.8 | 1.1 | 1.1 | 1.3 | 1.0 | 1.0 | 1.1  | 1.2               | 1.2 | 1.2 | 1.2 | 2.2 | 2.2 | 2.6 | 2.6  | 1.7 | 1.4 | 1.2                    | 1.1 | 1.2  | 1.1  | 1.1 | 1.1  | 1.1  | 1.1  | 1.1 | 1.1 | 1.1 | 1.1  | 1.1 | 1.1 | 1.1 | 1.1 |     |     |
| APOE      | APOE        | 0.4            | 0.4 | 0.3 | 1.2 | 1.0 | 0.5 | 0.4 | 1.9 | 1.9 | 0.9  | 1.0               | 1.3 | 1.0 | 0.6 | 0.1 | 5.8 | 5.2 | 5.5  | 5.3 | 3.5 | 5.0                    | 4.2 | 4.2  | 5.1  | 5.3 | 5.5  | 4.1  | 5.4  | 4.9 | 5.1 | 1.2 | 1.3  | 1.1 | 2.1 | 1.7 | 1.9 |     |     |
| LRP8      | APOER2      | 0.7            | 0.8 | 0.8 | 0.7 | 0.8 | 0.9 | 1.5 | 1.7 | 0.7 | 0.6  | 1.0               | 1.8 | 1.8 | 0.6 | 0.6 | 0.6 | 0.6 | 0.6  | 0.6 | 0.6 | 0.7                    | 0.5 | 0.5  | 0.6  | 0.5 | 0.5  | 0.6  | 1.2  | 1.2 | 1.1 | 0.7 | 0.9  | 1.0 | 1.3 |     |     |     |     |
| APP       | APP-695     | 0.8            | 0.8 | 0.8 | 0.7 | 0.8 | 0.9 | 1.3 | 1.5 | 1.0 | 1.1  | 1.3               | 1.4 | 1.5 | 1.4 | 1.5 | 2.0 | 2.1 | 2.0  | 2.6 | 2.0 | 3.3                    | 3.2 | 2.4  | 2.6  | 3.3 | 2.9  | 2.4  | 2.7  | 2.6 | 3.0 | 1.3 | 1.3  | 1.4 | 1.4 | 1.5 |     |     |     |
| APP       | APP-770     | 0.7            | 0.7 | 0.7 | 0.6 | 0.9 | 0.9 | 1.5 | 1.7 | 1.0 | 1.0  | 1.2               | 1.1 | 1.1 | 1.1 | 1.4 | 4.2 | 4.3 | 5.8  | 5.8 | 5.9 | 8.6                    | 5.7 | 12.3 | 12.1 | 7.0 | 8.1  | 11.7 | 11.0 | 9.1 | 9.0 | 8.7 | 11.1 | 1.6 | 1.7 | 1.5 | 2.1 | 2.3 | 2.4 |
| APP       | APP498      | 0.7            | 0.7 | 0.7 | 0.6 | 0.8 | 0.8 | 1.4 | 1.6 | 0.9 | 1.0  | 1.3               | 1.3 | 1.3 | 2.1 | 2.1 | 3.2 | 3.2 | 3.4  | 3.7 | 2.7 | 5.0                    | 4.8 | 3.4  | 4.2  | 3.5 | 3.6  | 4.2  | 4.1  | 4.6 | 1.4 | 1.5 | 1.3  | 1.6 | 1.8 | 2.1 |     |     |     |
| ATF3      | ATF3        | 0.6            | 0.5 | 0.6 | 0.7 | 0.7 | 0.6 | 1.8 | 2.1 | 0.4 | 0.5  | 2.2               | 1.4 | 1.8 | 1.1 | 1.1 | 1.1 | 1.3 | 1.3  | 1.1 | 0.4 | 0.5                    | 0.6 | 0.7  | 0.8  | 0.9 | 0.9  | 0.9  | 0.9  | 0.9 | 0.9 | 0.9 | 0.9  | 0.9 | 0.9 | 0.9 |     |     |     |
| AXIN2     | AXIN2       | 1.1            | 1.1 | 1.2 | 0.8 | 0.8 | 1.6 | 1.5 | 0.8 | 1.4 | 1.3  | 0.6               | 0.6 | 0.6 | 2.3 | 2.3 | 5.1 | 5.0 | 4.9  | 2.3 | 1.9 | 2.6                    | 2.6 | 3.5  | 3.5  | 2.4 | 2.5  | 2.1  | 4.2  | 3.7 | 2.5 | 1.1 | 1.2  | 1.3 | 1.1 | 1.0 | 1.2 |     |     |
| DLFM1     | BM Domain   | 0.6            | 0.6 | 0.6 | 0.6 | 0.8 | 0.8 | 0.8 | 1.0 | 1.4 | 1.6  | 1.1               | 1.3 | 1.5 | 0.5 | 0.5 | 0.6 | 0.6 | 0.6  | 0.4 | 0.4 | 0.6                    | 0.6 | 0.6  | 0.6  | 0.6 | 0.6  | 0.5  | 0.5  | 0.5 | 0.5 | 0.5 | 0.5  | 0.5 | 0.5 | 0.5 | 0.5 |     |     |
| BACE1     | BACE1       | 1.0            | 1.0 | 1.1 | 1.0 | 1.2 | 1.0 | 0.8 | 1.1 | 1.3 | 0.7  | 0.9               | 1.1 | 1.4 | 2.4 | 2.3 | 1.9 | 1.9 | 1.9  | 2.2 | 1.9 | 2.4                    | 2.3 | 1.8  | 2.0  | 2.1 | 2.6  | 2.2  | 2.0  | 2.6 | 1.3 | 1.1 | 1.0  | 1.2 | 1.1 | 1.2 | 1.1 |     |     |
| BACE2     | BACE2       | 0.9            | 0.8 | 0.7 | 1.1 | 1.0 | 0.9 | 1.4 | 1.2 | 0.9 | 0.8  | 1.3               | 1.3 | 1.0 | 0.9 | 1.0 | 0.8 | 0.8 | 1.1  | 1.0 | 0.6 | 0.7                    | 0.7 | 0.7  | 0.7  | 0.7 | 0.7  | 0.7  | 0.7  | 0.7 | 0.7 | 0.7 | 0.7  | 0.7 | 0.7 | 0.7 | 0.7 |     |     |
| BN1       | BN1         | 0.6            | 0.6 | 0.6 | 1.0 | 0.9 | 0.6 | 0.5 | 1.9 | 1.7 | 0.7  | 1.9               | 1.4 | 1.2 | 1.4 | 1.3 | 1.1 | 1.1 | 1.2  | 1.2 | 1.7 | 2.8                    | 2.8 | 1.9  | 2.0  | 3.2 | 3.4  | 2.5  | 1.7  | 1.7 | 1.0 | 0.9 | 0.9  | 0.9 | 1.3 | 1.4 | 1.2 |     |     |
| POU3F3    | BRN1        | 1.0            | 1.1 | 1.1 | 1.2 | 1.0 | 0.8 | 0.9 | 0.7 | 1.3 | 1.2  | 0.7               | 0.7 | 0.0 | 0.0 | 0.0 | 0.0 | 0.0 | 0.0  | 0.0 | 0.0 | 0.0                    | 0.0 | 0.0  | 0.0  | 0.0 | 0.0  | 0.0  | 0.0  | 0.0 | 0.0 | 0.0 | 0.0  | 0.0 | 0.0 | 0.0 |     |     |     |
| POU3F2    | BRN2        | 0.9            | 0.9 | 0.7 | 0.8 | 0.7 | 0.7 | 0.6 | 1.1 | 1.0 | 0.8  | 0.8               | 1.2 | 1.9 | 2.1 | 0.1 | 0.1 | 0.1 | 0.1  | 0.1 | 0.2 | 0.2                    | 0.1 | 0.0  | 0.1  | 0.1 | 0.1  | 0.1  | 0.1  | 0.1 | 0.1 | 0.1 | 0.1  | 0.1 | 0.1 | 0.1 |     |     |     |
| CCND2     | CCND2       | 1.1            | 1.1 | 1.2 | 1.1 | 1.1 | 1.0 | 1.3 | 1.3 | 0.8 | 0.8  | 0.8               | 0.8 | 2.2 | 2.1 | 2.4 | 4.6 | 4.3 | 4.1  | 4.2 | 3.1 | 5.2                    | 4.5 | 3.3  | 4.1  | 4.9 | 5.7  | 4.6  | 6.6  | 5.5 | 7.7 | 1.3 | 1.4  | 1.4 | 1.3 | 1.4 |     |     |     |
| CNTN1     | CNTN1       | 0.9            | 0.9 | 1.1 | 0.9 | 1.0 | 1.0 | 0.8 | 0.9 | 1.4 | 1.2  | 0.7               | 0.8 | 1.0 | 1.4 | 1.2 | 1.0 | 1.0 | 1.4  | 1.3 | 0.8 | 0.8                    | 1.5 | 1.3  | 1.0  | 1.6 | 1.1  | 1.0  | 1.6  | 1.0 | 1.5 | 1.4 | 1.2  | 1.3 | 1.2 | 1.3 |     |     |     |
| COX2      | COX2        | 0.5            | 0.5 | 0.6 | 0.7 | 0.6 | 0.4 | 0.3 | 2.3 | 4.6 | 0.3  | 0.4               | 1.2 | 0.5 | 0.6 | 0.9 | 1.0 | 2.4 | 2.8  | 2.8 | 1.2 | 1.4                    | 1.1 | 0.6  | 3.0  | 2.7 | 2.3  | 1.7  | 1.2  | 3.9 | 4.3 | 3.0 | 3.4  | 2.0 | 2.5 | 2.7 | 1.7 |     |     |
| BCL11B    | CTP2        | 1.7            | 1.8 | 0.5 | 0.3 | 0.4 | 2.2 | 2.1 | 0.3 | 0.3 | 1.2  | 1.1               | 0.3 | 0.4 | 0.3 | 0.3 | 0.3 | 0.3 | 0.3  | 0.3 | 0.3 | 0.3                    | 0.3 | 0.3  | 0.3  | 0.3 | 0.3  | 0.3  | 0.3  | 0.3 | 0.3 | 0.3 | 0.3  | 0.3 | 0.3 |     |     |     |     |
| CUX2      | CUX2        | 1.4            | 1.4 | 1.5 | 0.9 | 1.0 | 1.8 | 1.5 | 0.6 | 0.5 | 1.1  | 1.1               | 0.6 | 0.5 | 0.7 | 0.8 | 0.7 | 1.6 | 1.5  | 1.4 | 1.0 | 1.1                    | 1.7 | 1.8  | 1.2  | 0.8 | 0.7  | 1.0  | 1.1  | 0.9 | 1.0 | 1.2 | 0.7  | 0.6 | 0.7 | 0.5 |     |     |     |
| CALB1     | Calbindin   | 0.6            | 0.6 | 0.6 | 0.5 | 0.5 | 1.5 | 1.8 | 0.4 | 1.9 | 2.1  | 0.6               | 0.7 | 0.6 | 0.6 | 0.7 | 0.7 | 0.8 | 0.8  | 0.4 | 0.8 | 1.0                    | 0.9 | 1.1  | 1.4  | 0.8 | 0.8  | 0.9  | 0.5  | 1.1 | 1.0 | 0.9 | 1.6  | 1.8 | 1.6 | 1.5 |     |     |     |
| CALB2     | Calbindin   | 0.6            | 0.6 | 0.6 | 0.5 | 0.5 | 1.5 | 1.8 | 0.4 | 1.9 | 2.1  | 0.6               | 0.7 | 0.6 | 0.6 | 0.7 | 0.7 | 0.8 | 0.8  | 0.4 | 0.8 | 1.0                    | 0.9 | 1.1  | 1.4  | 0.8 | 0.8  | 0.9  | 0.5  | 1.1 | 1.0 | 0.9 | 1.6  | 1.8 | 1.6 | 1.5 |     |     |     |
| CUX1      | Cux1        | 1.1            | 1.1 | 1.1 | 0.8 | 0.9 | 0.9 | 0.8 | 1.1 | 1.2 | 0.8  | 0.8               | 1.2 | 1.5 | 1.5 | 1.4 | 1.4 | 1.4 | 1.4  | 1.4 | 1.1 | 1.7                    | 1.4 | 1.8  | 1.5  | 1.4 | 1.4  | 1.2  | 1.3  | 1.2 | 1.1 | 1.3 | 1.2  | 1.1 | 1.3 |     |     |     |     |
| CCND1     | CyclinD1    | 0.6            | 0.6 | 0.7 | 0.8 | 0.9 | 1.5 | 1.7 | 1.1 | 1.1 | 1.6  | 1.0               | 1.1 | 0.6 | 0.6 | 1.2 | 1.2 | 1.3 | 1.2  | 0.8 | 0.8 | 1.4                    | 1.0 | 0.9  | 1.2  | 1.1 | 0.8  | 1.2  | 1.1  | 0.8 | 1.2 | 1.1 | 1.4  | 1.6 | 1.6 | 1.2 |     |     |     |
| DAB1      | DAB1        | 2.0            | 1.9 | 2.0 | 0.7 | 0.8 | 1.3 | 1.2 | 0.4 | 0.3 | 1.1  | 1.1               | 0.4 | 0.4 | 0.2 | 0.2 | 0.4 | 0.3 | 0.4  | 1.4 | 0.9 | 2.7                    | 2.2 | 0.7  | 0.8  | 1.5 | 0.3  | 0.6  | 0.5  | 1.2 | 0.4 | 0.4 | 0.3  | 0.3 | 0.4 | 0.2 |     |     |     |
| DAB2      | DAB2        | 0.5            | 0.5 | 0.5 | 0.5 | 0.5 | 1.3 | 2.7 | 2.2 | 1.0 | 1.2  | 0.6               | 0.6 | 4.2 | 4.2 | 9.5 | 9.1 | 9.6 | 11.4 | 8.9 | 7.8 | 6.9                    | 8.9 | 8.7  | 7.0  | 5.4 | 12.7 | 11.2 | 8.0  | 2.4 | 2.8 | 2.4 | 2.8  | 2.7 | 3.1 | 1.6 |     |     |     |
| DCX       | DCX         | 1.3            | 1.3 | 1.3 | 0.8 | 0.9 | 1.3 | 1.3 | 0.9 | 1.2 | 1.3  | 1.3               | 1.3 | 1.3 | 2.2 | 2.2 | 2.6 | 2.6 | 1.7  | 1.4 | 1.4 | 1.4                    | 1.4 | 1.4  | 1.4  | 1.4 | 1.4  | 1.4  | 1.4  | 1.4 | 1.4 | 1.4 | 1.4  | 1.4 | 1.4 | 1.4 |     |     |     |
| DISC1     | DISC1-LHLV  | 1.1            | 1.1 | 1.3 | 1.1 | 0.8 | 1.5 | 1.4 | 0.7 | 0.5 | 13.9 | 0.7               | 0.5 | 5.8 | 6.4 | 5.4 | 5.8 | 5.4 | 5.4  | 5.4 | 5.8 | 5.4                    | 6.4 | 5.1  | 4.8  | 4.9 | 4.9  | 6.5  | 0.5  | 0.5 | 0.7 | 0.7 | 0.8  | 0.5 | 0.7 | 0.8 | 0.5 |     |     |
| DISC1     | DISC1-Lv    | 1.4            | 1.3 | 1.0 | 1.1 | 0.8 | 1.4 | 1.2 | 1.0 | 0.9 | 0.9  | 0.6               | 0.7 | 0.6 | 4.1 | 4.1 | 4.4 | 3.9 | 3.3  | 3.1 | 3.2 | 2.5                    | 4.0 | 3.6  | 3.0  | 2.8 | 3.7  | 3.6  | 2.9  | 3.1 | 3.2 | 4.6 | 0.7  | 0.7 | 0.7 | 0.4 |     |     |     |
| DISC1     | DISC1-3v    | 0.7            | 0.8 | 0.7 | 0.6 | 0.9 | 2.0 | 2.1 | 0.4 | 0.4 | 1.1  | 1.4               | 1.4 | 3.2 | 2.7 | 3.3 | 2.0 | 2.2 | 1.7  | 1.7 | 3.0 | 2.8                    | 1.5 | 1.4  | 2.8  | 2.4 | 2.2  | 2.3  | 3.2  | 1.4 | 1.4 | 1.2 | 1.6  | 1.9 | 0.9 |     |     |     |     |
| DISC1     | DISC1-ewv1  | 1.1            | 1.2 | 0.5 | 0.7 | 1.2 | 1.0 | 1.2 | 0.9 | 1.5 | 1.6  | 0.9               | 0.7 | 1.1 | 0.4 | 1.3 | 3.0 | 1.9 | 2.1  | 2.7 | 3.1 | 2.8                    | 4.0 | 2.3  | 2.4  | 2.1 | 1.7  | 2.1  | 2.1  | 5.0 | 1.5 | 1.3 | 1.8  | 0.7 | 0.9 | 1.4 |     |     |     |
| DISC1     | DISC1-ew10  | 0.9            | 0.9 | 0.8 | 0.8 | 0.9 | 1.2 | 1.3 | 0.9 | 1.4 | 1.2  | 1.3               | 1.3 | 1.3 | 2.2 | 2.2 | 2.6 | 2.6 | 3.1  | 3.0 | 2.7 | 4.1                    | 2.3 | 2.4  | 2.1  | 3.1 | 2.7  | 3.1  | 2.7  | 1.9 | 1.9 | 1.9 | 1.9  | 1.9 | 1.9 |     |     |     |     |
| DISC1     | DISC1-1     | 0.5            | 0.3 | 0.5 | 1.2 | 1.5 | 1.2 | 1.5 | 1.3 | 0.3 | 0.3  | 0.8               | 0.8 | 0.9 | 5.1 | 4.4 | 4.0 | 3.5 | 3.2  | 5.0 | 4.8 | 4.7                    | 7.3 | 5.8  | 1.5  | 3.5 | 2.9  | 2.4  | 3.2  | 2.0 | 1.1 | 1.3 | 1.1  | 0.5 | 0.8 | 2.4 |     |     |     |
| DISC1     | DISC1-ew6   | 0.6            | 0.7 | 0.4 | 0.6 | 0.8 | 0.9 | 1.0 | 3.0 | 3.5 | 0.1  | 0.2               | 0.9 | 1.1 | 1.4 | 3.1 | 2.9 | 2.1 | 1.8  | 1.7 | 1.3 |                        |     |      |      |     |      |      |      |     |     |     |      |     |     |     |     |     |     |
